# Supplementary material
Source: MDPI journal article supplement (https://www.mdpi.com/1424-8247/14/5/393)
Supplement: s1 [file s1]

## Supplemental file

**Table 1S.** Intra-day and inter-day accuracy expressed in RE%.

| Compound   | C1        |           | C2        |           | U1        |           |
|------------|-----------|-----------|-----------|-----------|-----------|-----------|
|            | Intra-day | Inter-day | Intra-day | Inter-day | Intra-day | Inter-day |
|            | (RE%)     | (RE %)    |
| DESA-NA-P  | 6.1       | 6.3       | 1.2       | 1.5       | 0.8       | 1.0       |
| COR        | 10.5      | 11.1      | 3.7       | 4.1       | 1.4       | 3.0       |
| ALDO       | 8.9       | 9.3       | 2.7       | 4.0       | 1.7       | 1.9       |
| PRE        | 7.0       | 9.8       | 5.8       | 6.6       | 2.6       | 3.5       |
| ME - PRE   | 8.2       | 9.0       | 2.4       | 4.9       | 1.3       | 2.4       |
| 11 - DOC   | 10.5      | 11.7      | 3.6       | 5.1       | 1.5       | 3.0       |
| COCO       | 5.2       | 5.9       | 1.1       | 1.4       | 1.7       | 1.3       |
| STA        | 12.6      | 13.5      | 5.3       | 5.5       | 3.2       | 3.3       |
| BOL        | 7.9       | 9.2       | 5.6       | 5.9       | 2.4       | 3.1       |
| NAN        | 13.0      | 13.2      | 3.7       | 4.3       | 1.2       | 2.3       |
| DESA - ISO | 10.8      | 10.4      | 5.7       | 7.1       | 3.6       | 4.2       |
| 11 - DCC   | 12.3      | 13.6      | 4.6       | 6.7       | 2.5       | 2.8       |
| TESTO      | 8.6       | 13.4      | 5.0       | 5.9       | 2.9       | 3.9       |
| ANDD       | 7.9       | 9.0       | 4.5       | 4.9       | 3.4       | 3.9       |
| DHEA       | 10.3      | 10.8      | 2.3       | 3.9       | 1.4       | 2.9       |
| ANDRO      | 9.0       | 10.3      | 3.2       | 3.6       | 1.1       | 2.0       |
| DHT        | 6.4       | 8.5       | 3.0       | 4.6       | 1.3       | 2.4       |

**Table 2S.** Percent recovery and reproducibility at two fortification levels.

| Compound   | CM               |     | C1               |     |
|------------|------------------|-----|------------------|-----|
|            | Recovery (n = 3) | CV% | Recovery (n = 3) | CV% |
| DESA-NA-P  | 97.7             | 0.9 | 91.1             | 3.1 |
| COR        | 96.6             | 1.4 | 89.8             | 5.7 |
| ALDO       | 95.1             | 0.9 | 92.1             | 3.6 |
| PRE        | 93.1             | 0.7 | 90.2             | 2.5 |
| ME - PRE   | 98.3             | 2.0 | 95.6             | 6.7 |
| 11 - DOC   | 97.6             | 1.5 | 93.3             | 4.3 |
| COCO       | 92.8             | 5.0 | 86.8             | 7.0 |
| STA        | 95.1             | 1.0 | 90.9             | 3.4 |
| BOL        | 96.2             | 1.2 | 93.3             | 5.8 |
| NAN        | 98.3             | 3.5 | 96.4             | 8.2 |
| DESA - ISO | 97.2             | 4.0 | 94.5             | 6.7 |
| 11 - DCC   | 95.9             | 3.1 | 92.8             | 4.7 |
| TESTO      | 95.7             | 0.8 | 93.4             | 2.6 |
| ANDD       | 95.7             | 1.1 | 93.3             | 4.0 |
| DHEA       | 96.0             | 3.1 | 90.2             | 6.9 |
| ANDRO      | 95.7             | 3.6 | 93.6             | 7.7 |
| DHT        | 91.1             | 1.1 | 88.5             | 5.5 |
